# Supplementary material for: Start codon disruption with CRISPR/Cas9 prevents murine Fuchs’ endothelial corneal dystrophy
Source: eLife. 2021 Jun 8;10:e55637. doi: 10.7554/eLife.55637 (PMC8216720; doi:10.7554/eLife.55637)
Supplement: Figure 3—figure supplement 1—source data 1. [file elife-55637-fig3-figsupp1-data1.xlsx]

## Sheet: Sheet1
		Staining intensity
		Epithelium	Endothelium	Background		Epithelium - isotype	Endothelium	Endothelium/Epithelium	(Endothelium-Background)/(Epithelium-Background)	Endo/Epi ratio after Isotype substraction
	Control	173.145	164.065	32.206		59.1993	52.3482	0.947558	0.935575	0.815899
		182.644	157.28	82.685		68.6983	45.5632	0.861129	0.746256	0.610968
		178.214	162.213	93.815		64.2682	50.4962	0.910215	0.810412	0.725853
		186.852	193.013	44.717		72.9062	81.2963	1.03297	1.04335	1.05233
	Low	215.974	153.696	83.253		102.028	41.9792	0.711641	0.53076	0.381271
		213.543	208.346	125.134		99.5973	96.6292	0.975663	0.941216	0.927072
		221.62	142.265	86.559		107.674	30.5482	0.641932	0.412451	0.257674
		151.181	132.754	7.619		37.2353	21.0372	0.878113	0.871644	0.47659
	Med	197.627	126.699	80.245		83.6813	14.9822	0.641102	0.395751	0.148449
		179.21	96.957	40.184		65.2643	-14.7598	0.541024	0.408362	-0.25171
		199.926	137.527	89.646		85.9802	25.8102	0.68789	0.434177	0.267333
		191.865	105.358	43.238		77.9193	-6.35875	0.549126	0.417959	-0.107148
	High	199.811	127.285	81.615		85.8653	15.5682	0.637027	0.386392	0.15142
		188.605	111.128	27.341		74.6592	-0.58875	0.58921	0.519564	-0.0366473
		217.717	131.132	82.396		103.771	19.4153	0.602305	0.360151	0.162134
		172.415	115.872	44.592		58.4692	4.15525	0.672053	0.557646	0.0317349
	Isotype	82.251	87.889	42.692
		124.834	124.577	93.88
		116.547	104.736	86.742
		132.151	129.665	92.529
						Summary
							Epithelium		Endothelium				Endo/Epi ratio
							average	stdev	average	stdev			average	stdev
						Control	66.268	5.88611	57.426	16.1691		Control	0.801263	0.187216
						Low	86.6338	33.1057	47.5485	33.822		Low	0.510652	0.291721
						Med	78.2113	9.27341	4.9185	18.7275		Med	0.0142307	0.236314
						High	80.6912	19.0583	9.6375	9.40584		High	0.0771604	0.0961782
							p-value_2	p-Value_2				Vs control
						Low	0.271301	0.617124				Low	0.144596
						Med	0.0725882	0.00541324				Med	0.00197425
						High	0.198264	0.00220085				High	0.000464831
