# Supplementary material for: Start codon disruption with CRISPR/Cas9 prevents murine Fuchs’ endothelial corneal dystrophy
Source: eLife. 2021 Jun 8;10:e55637. doi: 10.7554/eLife.55637 (PMC8216720; doi:10.7554/eLife.55637)
Supplement: Figure 4—figure supplement 3—source data 1. [file elife-55637-fig4-figsupp3-data1.xlsx]

## Sheet: a-wave
Supplemental Figure 10
ERG source data
a-wave		N (prior injection)	AdGFP 2week	AdCol8a2_2week	ConA_2weeks	N	AdGFP 2week	AdCol8a2	ConA	N	AdGFP 2week	AdCol8a2	ConA		N	AdGFP 4week	AdCOl8a2_4week	ConA_4weeks	N	AdGFP 4week	AdCOl8a2_4week	ConA_4weeks	N	AdGFP 4week	AdCOl8a2_4week	ConA_4weeks
	cd/log2	-1.7	-1.7	-1.7	-1.7	-0.8	-0.8	-0.8	-0.8	1	1	1	1		-1.7	-1.7	-1.7	-1.7	-0.8	-0.8	-0.8	-0.8	1	1	1	1
		5.4	7	4.9	0.3	27.5	31.7	58.3	8.2	89.8	97.2	137.2	23.8		5.4	8.4	13.1	2	27.5	35.8	58.9	21.2	89.8	118.2	119.6	40.7
		3.8	10.7	6.7	2.4	28	35.7	37.7	5.2	69.9	129.1	166.4	19.9		3.8	9	3.5	6.9	28	18.1	38.1	37.7	69.9	61.3	116.1	58
		1.1	4.7	6.2		23.9	26.3	29.1		46.6	84.4	119.3			1.1	7.1	12.2		23.9	37.3	43.7		46.6	82.8	137.8
		8.6	3.2	5.6		55	26.3	28.3		120.6	61	80			8.6	7.5	8.2		55	28.3	47.5		120.6	96.9	74.9
		8.2	5.6	0.4		15.2	22.2	25.1		65.7	48.6	56.8			8.2	8.4	2.2		15.2	34.9	29.4		65.7	72.2	64.3
		0.1	2.3	5.8		25.6	38.9	4.8		60	80.4	55.9			0.1	11.8	0.1		25.6	34.7	40.6		60	113.2	98.5
		2				31.8				114.1					2				31.8				114.1
		5.2				25.1				72.3					5.2				25.1				72.3
		6.4				14.7				57.3					6.4				14.7				57.3
		4.7				54				119.7					4.7				54				119.7
		8.4				20.6				79					8.4				20.6				79
		7.1				36				98.4					7.1				36				98.4
		11.5				63.5				101.8					11.5				63.5				101.8
		5.4				26.3				102.4					5.4				26.3				102.4
		N	AdGFP 2week	AdCol8a2_2week	ConA_2weeks	N	AdGFP 2week	AdCol8a2	ConA	N	AdGFP 2week	AdCol8a2	ConA		N	AdGFP 4week	AdCOl8a2_4week	ConA_4weeks	N	AdGFP 4week	AdCOl8a2_4week	ConA_4weeks	N	AdGFP 4week	AdCOl8a2_4week	ConA_4weeks
	average	5.56429	5.58333	4.93333	1.35	31.9429	30.1833	30.55	6.7	85.5429	83.45	102.6	21.85		5.56429	8.7	6.55	4.45	31.9429	31.5167	43.0333	29.45	85.5429	90.7667	101.867	49.35
	n	14	6	6	2	14	6	6	2	14	6	6	2		14	6	6	2	14	6	6	2	14	6	6	2
	stdev	3.15048	3.01424	2.30101	1.48492	15.0784	6.36566	17.442	2.12132	24.442	28.2903	45.466	2.75772		3.15048	1.66613	5.42909	3.46482	15.0784	7.26262	9.88204	11.6673	24.442	22.6713	28.1356	12.2329

## Sheet: b-wave
Supplemental Figure 10
ERG source data
b-wave		N (prior injection)	AdGFP 2week	AdCol8a2_2week	ConA_2weeks	N	AdGFP 2week	AdCol8a2	ConA	N	AdGFP 2week	AdCol8a2	ConA		N	AdGFP 4week	AdCOl8a2_4week	ConA_4weeks	N	AdGFP 4week	AdCOl8a2_4week	ConA_4weeks	N	AdGFP 4week	AdCOl8a2_4week	ConA_4weeks
	cd/log2	-1.7	-1.7	-1.7	-1.7	-0.8	-0.8	-0.8	-0.8	1	1	1	1		-1.7	-1.7	-1.7	-1.7	-0.8	-0.8	-0.8	-0.8	1	1	1	1
		123.6	142.2	226.6	18	234.9	260	372.2	33.5	311	355.6	436.9	59.4		123.6		190.2		234.9		345.2		311		395.7
		88.2	163.5	165.3	18.1	172.4	288.4	339.3	33.9	239.3	433.4	540.4	60.8		88.2		131.6		172.4		244.8		239.3		363.6
		60.4	83.3	124.2		136.8	183.2	239.7		190.4	267	337.9			60.4		145.4		136.8		282.5		190.4		380.7
		202.9	105.1	131.8		364.1	187.4	225.6		455.7	253.8	304.3			202.9		147.1		364.1		253.6		455.7		267.3
		67.1	78.8	91.8		143.6	150.1	174.6		244.7	180.4	211			67.1		74.2		143.6		168.3		244.7		244
		80.9	85.9	54.2		173.5	175.1	118.4		218.3	288.2	208.5			80.9		138.3		173.5		263.5		218.3		374.9
		145.6				286.5				433.1					145.6	127.4			286.5	263.7			433.1	405.4
		66.8				158.6				233.4					66.8	72.8			158.6	146.9			233.4	234.1
		63.4				129.8				182.8					63.4	117.1			129.8	223.8			182.8	265.7
		221.2				395.6				463.3					221.2	102			395.6	210.8			463.3	343.1
		78.8				184.6				296.7					78.8	81.5			184.6	192.2			296.7	261.2
		117.8				233.2				324.9					117.8	152.1			233.2	309.2			324.9	383.1
		201.5				349				324.3					201.5			58.2	349			120.9	324.3			109.8
		112.2				235.7				378.8					112.2			66.2	235.7			135.1	378.8			140.4
		N	AdGFP 2week	AdCol8a2_2week	ConA_2weeks	N	AdGFP 2week	AdCol8a2	ConA	N	AdGFP 2week	AdCol8a2	ConA		N	AdGFP 4week	AdCOl8a2_4week	ConA_4weeks	N	AdGFP 4week	AdCOl8a2_4week	ConA_4weeks	N	AdGFP 4week	AdCOl8a2_4week	ConA_4weeks
	average	116.457	109.8	132.317	18.05	228.45	207.367	244.967	33.7	306.907	296.4	339.833	60.1		116.457	108.817	137.8	62.2	228.45	224.433	259.65	128	306.907	315.433	337.7	125.1
	n	14	6	6	2	14	6	6	2	14	6	6	2		14	6	6	2	14	6	6	2	14	6	6	2
	stdev	56.1154	35.1852	59.6443	0.0707107	88.8616	54.1109	96.3955	0.282843	95.7199	87.7223	130.201	0.989949		56.1154	29.5881	37.3461	5.65685	88.8616	56.5047	57.3719	10.0409	95.7199	71.3695	64.8128	21.6375
