# Supplementary material for: Start codon disruption with CRISPR/Cas9 prevents murine Fuchs’ endothelial corneal dystrophy
Source: eLife. 2021 Jun 8;10:e55637. doi: 10.7554/eLife.55637 (PMC8216720; doi:10.7554/eLife.55637)
Supplement: Figure 4—source data 1. [file elife-55637-fig4-data1.xlsx]

## Sheet: Corneal Thickness
		No Injection	0.63x10^7	0.25x10^8	1.0x10^8
		88.2353	110.588	96.4706	117.647
		110.588	91.7647	122.353	115.294
		96.4706	110.588	108.235	103.529
		103.529	105.882	105.882	110.588
		89.4118	96.4706	96.4706	96.4706
		94.1176	110.588	98.8235	108.235
		110.588	80	101.176	105.882
		94.1176	84.7059	110.588	70.5882
		98.8235		80
		105.882
		108.235
		110.588
	Average (um)	100.882	98.8235	102.222	103.529
	Standard deviation	8.39606	12.3869	11.7123	14.8813
	Sample number	12	8	9	8

## Sheet: Anova
Anova: Single Factor
SUMMARY
Groups	Count	Sum	Average	Variance
Column 1	12	1210.59	100.882	70.4939
Column 2	8	790.588	98.8235	153.435
Column 3	9	920	102.222	137.178
Column 4	8	828.235	103.529	221.453
ANOVA
Source of Variation	SS	df	MS	F	P-value	F crit
Between Groups	98.5266	3	32.8422	0.240999	0.867102	2.89156
Within Groups	4497.08	33	136.275
Total	4595.6	36
