# Supplementary material for: Start codon disruption with CRISPR/Cas9 prevents murine Fuchs’ endothelial corneal dystrophy
Source: eLife. 2021 Jun 8;10:e55637. doi: 10.7554/eLife.55637 (PMC8216720; doi:10.7554/eLife.55637)
Supplement: Figure 4—source data 2. [file elife-55637-fig4-data2.xlsx]

## Sheet: Sheet1
			AdCas9Col8a2gRNA
		No injection	Low	Med	High
		2146.53	2515.81	2496.47	1206.22
		2286.7	2365.54	2500.13	1428.42
		2285.27	2689.78	2617.6	1297.18
		2559.13	2298.39	1653.29	1068.22
		2620.94	2258.62	2020.76	1205.55
		2371.72	2584.86	2225.7	1236.35
		2280.98	1849.38	2625.01
		2387.45	1868.97	2546.96
		2129.01	2442.61	2536.3
	average	2340.86	2319.33	2358.03	1240.32
	standard deviation	166.38	293.998	330.417	118.844
