# Supplementary material for: Start codon disruption with CRISPR/Cas9 prevents murine Fuchs’ endothelial corneal dystrophy
Source: eLife. 2021 Jun 8;10:e55637. doi: 10.7554/eLife.55637 (PMC8216720; doi:10.7554/eLife.55637)
Supplement: Figure 5—source data 1. [file elife-55637-fig5-data1.xlsx]

## Sheet: Insertion&Deletion
		Insertion
		Forward	Reverse		87554				Insertion			97749				Insertion			87908				Insertion
	Total	8225	8153		% of total			Total	12186	12016		% of total			Total	6504	7004		% of total			Total	10211	9620		% of total			Average of four corneas	Standard deviation
	1	8007	7940	15947	18.2139			1	11943	11774	23717	24.2632			1	6382	6881	13263	15.0874			1	9885	9289	19174	21.8114			19.844	4.02834
	2	203	204	407	0.464856			2	243	242	485	0.496169			2	110	108	218	0.247987			2	284	290	574	0.652955			0.465492	0.166726
	3	15	9	24	0.0274117			3	0	0	0	0			3	12	15	27	0.0307139			3	42	41	83	0.0944169			0.0381356	0.0399666
	4	0	0	0	0			4	0	0	0	0			4	0	0	0	0			4	0	0	0	0			0	0
	5	0	0	0	0			5	0	0	0	0			5	0	0	0	0			5	0	0	0	0			0	0
		Deletion
	Total	1488	1460						2119	1973						1303	1433						1882	1774
	-1	162	173	335	0.382621			-1	207	211	418	0.427626			-1	104	117	221	0.226089			-1	257	234	491	0.502307			0.384661	0.11667
	-2	412	411	823	0.939991			-2	708	614	1322	1.35244			-2	311	347	658	0.673153			-2	484	524	1008	1.03121			0.9992	0.280249
	-3	178	142	320	0.365489			-3	182	174	356	0.364198			-3	185	189	374	0.382613			-3	188	175	363	0.371359			0.370915	0.00839827
	-4	125	115	240	0.274117			-4	212	205	417	0.426603			-4	152	177	329	0.336576			-4	275	237	512	0.523791			0.390272	0.108816
	-5	44	52	96	0.109647			-5	0	0	0	0			-5	50	63	113	0.115602			-5	97	91	188	0.192329			0.104395	0.0791285
	-6	37	42	79	0.09023			-6	99	101	200	0.204606			-6	26	29	55	0.0562666			-6	53	37	90	0.0920726			0.110794	0.0646716
	-7	78	98	176	0.201019			-7	81	76	157	0.160615			-7	36	21	57	0.0583126			-7	10	6	16	0.0163685			0.109079	0.0861808
	-8	60	59	119	0.135916			-8	33	33	66	0.0675199			-8	48	50	98	0.100257			-8	47	61	108	0.110487			0.103545	0.028312
	-9	55	48	103	0.117642			-9	39	35	74	0.0757041			-9	51	63	114	0.116625			-9	107	115	222	0.227112			0.134271	0.0649038
	-10	25	33	58	0.0662448			-10	4	3	7	0.0071612			-10	12	15	27	0.0276218			-10	11	16	27	0.0276218			0.0321624	0.024684
	-11	70	67	137	0.156475			-11	106	113	219	0.224043			-11	64	82	146	0.149362			-11	48	28	76	0.0777502			0.151908	0.0598058
	-12	41	49	90	0.102794			-12	41	27	68	0.0695659			-12	53	56	109	0.11151			-12	26	16	42	0.0429672			0.0817092	0.0315228
	-13	20	23	43	0.0491125			-13	3	9	12	0.0122763			-13	50	46	96	0.0982107			-13	32	31	63	0.0644508			0.0560126	0.0356481
	-14	23	13	36	0.0411175			-14	107	98	205	0.209721			-14	24	28	52	0.0531975			-14	62	39	101	0.103326			0.10184	0.076798
	-15	0	0	0	0			-15	35	30	65	0.0664968			-15	38	42	80	0.0818423			-15	3	7	10	0.0102303			0.0396423	0.0405733
	-16	3	6	9	0.0102794			-16	0	5	5	0.00511514			-16	29	27	56	0.0572896			-16	8	4	12	0.0122763			0.0212401	0.0242217
	-17	30	22	52	0.0593919			-17	91	78	169	0.172892			-17	22	25	47	0.0480823			-17	41	29	70	0.071612			0.0879945	0.057408
	-18	23	19	42	0.0479704			-18	70	81	151	0.154477			-18	12	11	23	0.0235297			-18	41	50	91	0.0930956			0.0797682	0.0575411
	-19	15	13	28	0.0319803			-19	19	15	34	0.034783			-19	0	0	0	0			-19	12	7	19	0.0194375			0.0215502	0.0158405
	-20	42	32	74	0.0845193			-20	38	35	73	0.0746811			-20	12	14	26	0.0265987			-20	11	10	21	0.0214836			0.0518207	0.0323949
	-21	19	18	37	0.0422596			-21	0	0	0	0			-21	0	0	0	0			-21	0	0	0	0			0.0105649	0.0211298
	-22	0	0	0	0			-22	0	0	0	0			-22	0	0	0	0			-22	0	0	0	0			0	0
	-23	8	9	17	0.0194166			-23	0	0	0	0			-23	0	0	0	0			-23	0	0	0	0			0.00485415	0.00970829
	-24	0	0	0	0			-24	0	0	0	0			-24	0	0	0	0			-24	0	0	0	0			0	0
	-25	0	0	0	0			-25	0	0	0	0			-25	12	13	25	0.0255757			-25	0	0	0	0			0.00639393	0.0127879
	-26	0	0	0	0			-26	0	0	0	0			-26	0	0	0	0			-26	0	0	0	0			0	0
	-27	0	0	0	0			-27	0	0	0	0			-27	0	0	0	0			-27	20	11	31	0.0317139			0.00792847	0.0158569
	-28	3	4	7	0.00799507			-28	0	0	0	0			-28	3	7	10	0.0102303			-28	0	0	0	0			0.00455634	0.00533975
	-29	0	0	0	0			-29	0	0	0	0			-29	0	0	0	0			-29	16	17	33	0.0337599			0.00843998	0.01688
	-30	0	0	0	0			-30	0	0	0	0			-30	0	0	0	0			-30	0	0	0	0			0	0
	-31	0	0	0	0			-31	25	16	41	0.0419442			-31	0	0	0	0			-31	0	0	0	0			0.010486	0.0209721
	-32	5	3	8	0.00913722			-32	0	0	0	0			-32	0	0	0	0			-32	0	0	0	0			0.0022843	0.00456861
	-33	2	7	9	0.0102794			-33	0	0	0	0			-33	0	0	0	0			-33	0	0	0	0			0.00256984	0.00513969
	-34	8	2	10	0.0114215			-34	5	1	6	0.00613817			-34	9	11	20	0.0204606			-34	0	0	0	0			0.00950507	0.00866753
	-35	0	0	0	0			-35	14	13	27	0.0276218			-35	0	0	0	0			-35	33	29	62	0.0634278			0.0227624	0.0300751
	-36	0	0	0	0			-36	0	0	0	0			-36	0	0	0	0			-36	0	0	0	0			0	0
	-37	0	0	0	0			-37	0	0	0	0			-37	0	0	0	0			-37	0	0	0	0			0	0
	-38	0	0	0	0			-38	0	0	0	0			-38	0	0	0	0			-38	0	0	0	0			0	0
	-39	0	0	0	0			-39	0	0	0	0			-39	0	0	0	0			-39	0	0	0	0			0	0
	-40	0	0	0	0			-40	0	0	0	0			-40	0	0	0	0			-40	0	0	0	0			0	0
