# Supplementary material for: Start codon disruption with CRISPR/Cas9 prevents murine Fuchs’ endothelial corneal dystrophy
Source: eLife. 2021 Jun 8;10:e55637. doi: 10.7554/eLife.55637 (PMC8216720; doi:10.7554/eLife.55637)
Supplement: Figure 6—source data 1. [file elife-55637-fig6-data1.xlsx]

## Sheet: C57BL6j mice
Very low: 0.4x10^6, Low:1.6x10^6, Med:6.3x10^6, High: 25x10^6
							No detection was considered as 0.	No detection was considered as 0.
			QT ratio, normal as 1	No Indel ratio, normal as 1	NoIndel/total col8a2	Normalized NoIndel/total Col8a2	Cas9/GAPDH ratio	gRNA/GAPDH ratio
	No injection	1	0.996394	1.01407	1.01774	0.99115	0	0
		2	0.929633	0.998373	1.07394	1.04589	0	0
		3	1.03639	1.01667	0.980965	0.955339	0	0
		4	0.892692	1.03066	1.15456	1.1244	0	0
		5	1.08389	1.04937	0.968154	0.942862	0	0
		6	1.00631	0.97168	0.96559	0.940365	0	0
	Very low	7	1.17503	1.2784	1.08797	1.05955	0.00765715	0.00552956
		8	1.04494	1.12452	1.07615	1.04804	0	0
		9	1.0378	1.21792	1.17356	1.1429	0.024953	0.00314857
		10	1.62586	1.71051	1.05207	1.02458	0.0648756	0
		11	0.903771	0.896247	0.991675	0.965769	0	0
		12	0.645627	0.556555	0.862038	0.839519	0	0
	Low	13	3.70834	2.11162	0.569423	0.554548	0	0
		14	0.717718	0.560173	0.780491	0.760102	0.0177197	0.00992416
		15	0.721345	0.611504	0.847728	0.825583	0.16677	0.0583774
		16	1.0573	0.858034	0.811531	0.790331	0.0280933	0.00315517
		17	0.643304	0.746587	1.16055	1.13023	0	0
		18	0.35697	0.365214	1.0231	0.996369	0	0.006377
	Med	19	0.883597	0.553536	0.626457	0.610092	0.494077	0.172592
		20	0.986765	0.516832	0.523764	0.510082	0.103772	0.0417729
		21	0.67227	0.36863	0.548336	0.534012	0.821512	0.135085
		22	1.06724	0.836834	0.784114	0.76363	0.310665	0.0309496
		23	1.56146	1.05225	0.673887	0.656283	0.311116	0.0509021
		24	3.09426	1.42182	0.459502	0.447498	0.18474	0.147294
	High	25	1.40348	0.63734	0.454115	0.442252	0.350615	0.105328
		26	0.923574	0.0861673	0.0932976	0.0908604	1.1861	0.57401
		27	0.367568	0.244747	0.665857	0.648462	0.17193	0.0290865
		28	0.760747	0.529707	0.696299	0.678109	0.117875	0.0178105
		29	1.5925	0.344476	0.216312	0.210661	0.923324	0.209828
		30	0.306197	0.407206	1.32988	1.29514	0.0210055	0.0158344
				QT col8a2 (total)		NoIndel col8a2		NoIndel/Total	STDEV	p-Value	Cas9/GAPDH			gRNA/GAPDH
			Normal	0.990885	0.0698327	1.01347	0.0267191	1	0.0727653		0	0		0	0
			Very low	1.07217	0.325382	1.13069	0.387363	1.01339	0.102693	0.799635	0.0162476	0.0257147		0.00144636	0.00236381
			Low	1.20083	1.24856	0.875522	0.628399	0.842861	0.199589	0.100098	0.0354305	0.0653965		0.0129723	0.0225715
			Med	1.3776	0.891218	0.79165	0.394522	0.586933	0.113769	2.08146e-05	0.37098	0.257464		0.0964326	0.062016
			High	0.892344	0.527016	0.374941	0.197543	0.560914	0.428532	0.0328566	0.461808	0.478871		0.15865	0.216797

## Sheet: Col8a2 mice
Very low: 0.4x10^6, Low:1.6x10^6, Med:6.3x10^6, High: 25x10^6
							No detection was considered as 0.	No detection was considered as 0.
			QT ratio, normal as 1	No Indel ratio, normal as 1	NoIndel/total col8a2	Normalized NoIndel/total Col8a2	Cas9/GAPDH ratio	gRNA/GAPDH ratio
	No injection	1	0.985599	1.0651	1.08066	1.0795	0	0
		2	0.89628	0.853647	0.952434	0.951413	0	0
		3	0.996516	0.988224	0.991679	0.990617	0	0
		4	1.00445	1.182	1.17677	1.1755	0	0
		5	0.94596	0.85198	0.900651	0.899686	0	0
		6	1.17119	1.05905	0.904245	0.903276	0	0
	Very low	7	0.634726	0.621525	0.979201	0.978152	0.00765715	0.00552956
		8	0.602564	0.600814	0.997095	0.996027	0	0
		9	0.737791	0.617374	0.836788	0.835892	0.024953	0.00314857
		10	0.721273	0.750784	1.04092	1.0398	0.0648756	0
		11	0.991618	1.00577	1.01427	1.01318	0	0
		12	0.649615	0.577803	0.889454	0.888501	0	0
	Low	13	0.722183	0.557011	0.771288	0.770461	0	0
		14	0.45851	0.239621	0.522608	0.522048	0.0177197	0.00992416
		15	0.427304	0.463269	1.08417	1.08301	0.16677	0.0583774
		16	0.530464	0.417807	0.787626	0.786782	0.0280933	0.00315517
		17	0.553953	0.413976	0.747311	0.74651	0	0
		18	0.610329	0.536139	0.878443	0.877501	0	0.006377
	Med	19	0.391416	0.155559	0.397425	0.396999	0.494077	0.172592
		20	0.519824	0.400671	0.770782	0.769956	0.103772	0.0417729
		21	2.31533	1.71456	0.740523	0.73973	0.821512	0.135085
		22	2.43178	1.39741	0.574648	0.574032	0.310665	0.0309496
		23	0.492087	0.30389	0.617554	0.616892	0.311116	0.0509021
		24	0.501596	0.478547	0.954047	0.953025	0.18474	0.147294
	High	25	3.80256	0.816546	0.214736	0.214506	0.350615	0.105328
		26	3.17447	0.329282	0.103728	0.103617	1.1861	0.57401
		27	0.401568	0.361908	0.901238	0.900272	0.17193	0.0290865
		28	0.676131	0.428066	0.633111	0.632432	0.117875	0.0178105
		29	1.41006	0.170361	0.120818	0.120688	0.923324	0.209828
		30	0.548329	0.0840456	0.153276	0.153112	0.0210055	0.0158344
				QT col8a2		NoIndel col8a2		NoIndel/Total	STDEV	p-Value	Cas9/GAPDH			gRNA/GAPDH
			Normal	1	0.0929779	1	0.12986	1	0.108618		0	0		0	0
			Very low	0.722931	0.141463	0.695678	0.163534	0.958592	0.0791543	0.467848	0.0162476	0.0257147		0.00144636	0.00236381
			Low	0.550457	0.106871	0.43797	0.113818	0.797718	0.182884	0.0420911	0.0354305	0.0653965		0.0129723	0.0225715
			Med	1.10867	0.981483	0.741773	0.647642	0.675106	0.190452	0.00461422	0.37098	0.257464		0.0964326	0.062016
			High	1.66885	1.46517	0.365035	0.255334	0.354105	0.332529	0.00110381	0.461808	0.478871		0.15865	0.216797
