# Supplementary material for: Start codon disruption with CRISPR/Cas9 prevents murine Fuchs’ endothelial corneal dystrophy
Source: eLife. 2021 Jun 8;10:e55637. doi: 10.7554/eLife.55637 (PMC8216720; doi:10.7554/eLife.55637)
Supplement: Figure 7—source data 1. [file elife-55637-fig7-data1.xlsx]

## Sheet: TimeCourse
Time course, in vivo rostock
					Col8a2_Non-injection						Col8a2_AdCas9injected
		C57 2M	Col8a2 2M		Col8a2_3M	Col8a2_4M	Col8a2_5M	Col8a2_6M	col8a2_9M		Col8a2_3M	Col8a2_4M	Col8a2_5M	Col8a2_6M	col8a2_9M
		2506	2273	1	1846	1646	1449	1264	832		1943	2013	1769	1860	1472
		2522	2162	2	2077	1882	1719	1397	993		2055	1989	1832	1777	1199
		2495	2013	3	2079	1650	1382	1110	866		2120	1704	1704	1509	1270
		2586	2371	4	1902	1603	1205	1105	997		1768	1701	1628	1382	1648
				5	2097	1727	1450	1307	1198		2185	1881	1612	1493	1589
	Average	2527.25	2204.75		2000.2	1701.6	1441	1236.6	977.2		2014.2	1857.6	1709	1604.2	1435.6
	SD	40.7052	153.724		117.152	110.301	184.801	127.261	143.912		164.1	150.066	93.1719	203.774	195.814
				ttest	0.880461	0.0979581	0.0200275	0.00906947	0.00292385

## Sheet: 12M_invivoAnalysis
12-Month, rostock in vivo corneal endothelium density
					Col8a2_12M
				C57_12M	NoInjection	AdCas9
				2201	671.6	1212
				2119.7	823	1078.4
				2110.5	655.4	1241.5
				2105.3	556.8	1031.3
			Average	2134.12	676.7	1140.8
			STDEV	44.9791	109.938	101.807

## Sheet: 12M_Alizarin red
Further details are available in Figure8_source data
			Col8a2_12M
		C57_12M	NoInjection	AdCas9
		2305.99	627.686	1144.11
		2059.32	643.227	1137.43
		2052.16	752.882	1396.67
		2013.62	760.822	1347.59
	average	2107.77	696.154	1256.45
	standard deviation	133.658	70.4489	135.096
