# Supplementary material for: Start codon disruption with CRISPR/Cas9 prevents murine Fuchs’ endothelial corneal dystrophy
Source: eLife. 2021 Jun 8;10:e55637. doi: 10.7554/eLife.55637 (PMC8216720; doi:10.7554/eLife.55637)
Supplement: Figure 8—source data 1. [file elife-55637-fig8-data1.xlsx]

## Sheet: C57_12M
Alizarin red, C57, 12M
					stdev/average	average	stdev	Ave.of Hex		stdev/average
					0.225016	2305.99	518.883	0.5		0.225016
	Hexagonality				0.159209	2059.32	327.861	0.54		0.159209
	1	yes, 6 cells			0.162674	2052.16	333.833	0.64		0.162674
	2	No, less than 6			0.204548	2013.62	411.883	0.52		0.204548
	3	No, more than 6		average	0.187862	2107.77	398.115	0.55		0.187862
	4	extra		stdev	0.0322196	133.658	89.1486	0.0621825		0.0322196
			C57_12M_1						C57_12M_2						C57_12M_3						C57_12M_4
				Pixcel	Area (um2)	cells/mm	polygonality			Pixcel	Area (um2)	cells/mm	polygonality			Pixcel	Area (um2)	cells/mm	polygonality			Pixcel	Area (um2)	cells/mm	polygonality
			1	2706	375.352	2664.16	1		1	3793	526.131	1900.67	1		1	3013	417.937	2392.71	1		1	5453	756.392	1322.07	3
			2	3822	530.154	1886.24	3		2	4422	613.381	1630.31	3		2	4073	564.971	1770	3		2	3859	535.286	1868.16	1
			3	2446	339.288	2947.35	2		3	4012	556.509	1796.92	3		3	3117	432.363	2312.87	1		3	3380	468.844	2132.91	1
			4	3424	474.947	2105.5	3		4	4055	562.474	1777.86	3		4	3479	482.576	2072.21	1		4	3664	508.238	1967.58	1
			5	2636	365.643	2734.91	1		5	4226	586.193	1705.92	3		5	3443	477.583	2093.88	3		5	4081	566.08	1766.53	3
			6	2915	404.343	2473.15	1		6	4207	583.558	1713.63	1		6	2968	411.695	2428.98	1		6	3582	496.863	2012.63	1
			7	2978	413.082	2420.83	1		7	3670	509.07	1964.37	1		7	3068	425.566	2349.81	1		7	3316	459.966	2174.07	3
			8	3012	417.798	2393.5	1		8	4620	640.846	1560.44	3		8	3008	417.243	2396.68	2		8	4532	628.639	1590.74	1
			9	2946	408.643	2447.12	1		9	3556	493.257	2027.34	1		9	3773	523.357	1910.74	2		9	3636	504.354	1982.74	3
			10	2639	366.059	2731.8	1		10	3837	532.235	1878.87	1		10	3780	524.328	1907.2	1		10	3875	537.506	1860.45	3
			11	2437	338.039	2958.24	1		11	4130	572.877	1745.58	1		11	3200	443.876	2252.88	1		11	4713	653.746	1529.65	2
			12	2858	396.437	2522.47	1		12	3512	487.154	2052.74	1		12	4251	589.661	1695.89	1		12	4224	585.916	1706.73	1
			13	2434	337.623	2961.88	2		13	3648	506.018	1976.21	1		13	3368	467.179	2140.51	2		13	3471	481.466	2076.99	1
			14	3474	481.883	2075.19	1		14	3727	516.977	1934.32	1		14	4017	557.203	1794.68	1		14	4365	605.474	1651.6	1
			15	3175	440.408	2270.62	1		15	3389	470.092	2127.24	1		15	2791	387.143	2583.03	2		15	4173	578.842	1727.59	3
			16	3456	479.386	2086	3		16	3684	511.012	1956.9	1		16	3658	507.405	1970.81	1		16	3040	421.682	2371.46	2
			17	2695	373.827	2675.04	2		17	3176	440.547	2269.91	1		17	4277	593.268	1685.58	1		17	3990	553.458	1806.82	3
			18	5058	701.601	1425.31	3		18	3239	449.285	2225.76	1		18	2810	389.778	2565.56	2		18	2915	404.343	2473.15	1
			19	3403	472.034	2118.49	3		19	4482	621.703	1608.48	3		19	3143	435.969	2293.74	1		19	3076	426.676	2343.7	2
			20	2655	368.278	2715.34	2		20	2808	389.501	2567.39	2		20	3335	462.602	2161.69	1		20	3470	481.328	2077.59	1
			21	2926	405.869	2463.85	3		21	3327	461.492	2166.88	1		21	4030	559.006	1788.89	1		21	4041	560.532	1784.02	1
			22	2519	349.413	2861.94	2		22	4393	609.358	1641.07	1		22	4900	679.685	1471.27	1		22	4475	620.732	1611	1
			23	4751	659.017	1517.41	3		23	2751	381.594	2620.58	2		23	2619	363.285	2752.66	2		23	4153	576.067	1735.91	3
			24	3958	549.019	1821.43	1		24	3643	505.325	1978.93	1		24	3319	460.382	2172.11	3		24	2388	331.242	3018.94	2
			25	4878	676.633	1477.91	3		25	3068	425.566	2349.81	2		25	3818	529.599	1888.22	1		25	3052	423.346	2362.13	3
			26	2598	360.372	2774.91	2		26	3349	464.544	2152.65	2		26	3785	525.022	1904.68	1		26	3028	420.017	2380.85	1
			27	3778	524.051	1908.21	1		27	3361	466.208	2144.96	1		27	4330	600.619	1664.95	3		27	2742	380.346	2629.18	2
			28	7319	1015.23	985.001	3		28	4039	560.254	1784.9	3		28	4123	571.906	1748.54	1		28	3153	437.356	2286.47	2
			29	6741	935.052	1069.46	3		29	3239	449.285	2225.76	3		29	4364	605.336	1651.98	3		29	4335	601.313	1663.03	3
			30	3246	450.256	2220.96	1		30	3925	544.441	1836.75	3		30	3690	511.844	1953.72	1		30	3692	512.122	1952.66	3
			31	3161	438.466	2280.68	1		31	4425	613.797	1629.2	1		31	3869	536.673	1863.33	1		31	5326	738.776	1353.59	1
			32	4392	609.219	1641.44	1		32	4355	604.087	1655.39	1		32	3426	475.224	2104.27	1		32	4620	640.846	1560.44	1
			33	3872	537.09	1861.89	3		33	3639	504.77	1981.1	3		33	2577	357.459	2797.53	2		33	3248	450.534	2219.59	2
			34	2202	305.442	3273.94	2		34	3122	433.056	2309.17	2		34	3193	442.905	2257.82	2		34	3059	424.317	2356.73	1
			35	3579	496.447	2014.31	3		35	3575	495.892	2016.57	1		35	4456	618.097	1617.87	3		35	5469	758.611	1318.2	1
			36	4161	577.177	1732.57	3		36	3433	476.195	2099.98	3		36	2541	352.465	2837.16	1		36	4300	596.458	1676.56	1
			37	2102	291.571	3429.7	2		37	2759	382.704	2612.98	1		37	4219	585.222	1708.75	1		37	4518	626.697	1595.67	1
			38	3049	422.93	2364.46	1		38	2720	377.294	2650.45	1		38	3352	464.96	2150.72	1		38	3192	442.766	2258.53	2
			39	3077	426.814	2342.94	1		39	3942	546.799	1828.82	3		39	3302	458.024	2183.29	1		39	3253	451.227	2216.18	1
			40	3086	428.063	2336.11	1		40	3545	491.731	2033.63	1		40	3802	527.38	1896.17	1		40	4662	646.671	1546.38	1
			41	3027	419.879	2381.64	1		41	2828	392.275	2549.23	3		41	3533	490.067	2040.54	1		41	2645	366.891	2725.6	2
			42	3164	438.882	2278.52	1		42	3208	444.985	2247.26	1		42	3469	481.189	2078.19	1		42	4678	648.891	1541.09	3
			43	2867	397.685	2514.55	2		43	2408	334.016	2993.86	2		43	4130	572.877	1745.58	1		43	2972	412.25	2425.72	2
			44	3733	517.809	1931.21	3		44	3628	503.244	1987.11	1		44	5232	725.737	1377.91	3		44	3642	505.186	1979.47	1
			45	2456	340.675	2935.35	2		45	4276	593.129	1685.97	3		45	3301	457.886	2183.95	1		45	2640	366.197	2730.77	1
			46	2539	352.188	2839.4	1		46	3288	456.082	2192.59	1		46	3136	434.998	2298.86	2		46	2448	339.565	2944.94	1
			47	3280	454.973	2197.93	1		47	2744	380.623	2627.27	2		47	4126	572.322	1747.27	1		47	3415	473.699	2111.05	1
			48	3276	454.418	2200.62	1		48	3342	463.573	2157.16	1		48	4084	566.496	1765.24	3		48	3034	420.85	2376.15	2
			49	2625	364.117	2746.37	2		49	2940	407.811	2452.12	2		49	3618	501.857	1992.6	1		49	3698	512.954	1949.49	3
			50	3160	438.327	2281.4	1		50	3730	517.393	1932.77	3		50	3300	457.747	2184.61	2		50	3740	518.78	1927.6	1

## Sheet: Col8a2_12M
Alizarin Red, Col8a2, 12M
													average	stdev
					Mouse	treatment	density ave	density stdev	hex cells	stdev/ave		Ad-cas9 injected	1256.45	135.096
					501OD	Ad-Cas9	1144.11	525.232	0.4	0.459074		Noinjection	696.154	70.4489
					501OS	No inject	627.686	435.287	0.14	0.693479
					504OD	Ad-Cas9	1137.43	312.64	0.4	0.274865
	Hexagonality				504OS	No inject	643.227	397.226	0.22	0.617551
	1	yes, 6 cells			502OD	Ad-Cas9	1396.67	458.437	0.3	0.328236
	2	No, less than 6			502OS	No inject	752.882	452.608	0.2	0.601167
	3	No, more than 6			509OD	Ad-Cas9	1347.59	562.799	0.36	0.417635
	4	extra			509OS	No inject	760.822	480.995	0.1	0.632204
	Ad-Cas9-Col8a2gRNA injected Col8a2 cornea																												non-injected col8a2 cornea
			Pixcel	Area (um2)	cells/mm	polygonality				Pixcel	Area (um2)	cells/mm	polygonality				Pixcel	Area (um2)	cells/mm	polygonality				Pixcel	Area (um2)	cells/mm	polygonality				Pixcel	Area (um2)	cells/mm	polygonality				Pixcel	Area (um2)	cells/mm					Pixcel	Area (um2)	cells/mm	polygonality
	501OD	1	42749	5929.76	168.641	3		504OD	1	6301	874.019	1144.14	2		502OD	1	7321	1015.5	984.732	1		509OD1	1	27312	3788.48	263.958	3		501OS	1	17432	2418.01	413.563	3		504OS	1	24182	3354.31	298.124	4		502OS	1	29875	4144	241.313	1
	501OD	2	10376	1439.27	694.798	2		504OD	2	7866	1091.1	916.505	1		502OD	2	5131	711.727	1405.03	1		509OD1	2	2788	386.727	2585.81	2		501OS	2	6631	919.794	1087.2	2		504OS	2	24345	3376.92	296.128	2		502OS	2	18504	2566.71	389.604	3
	501OD	3	11262	1562.17	640.137	3		504OD	3	5812	806.189	1240.4	2		502OD	3	5674	787.047	1270.57	2		509OD1	3	12010	1665.92	600.269	1		501OS	3	32915	4565.68	219.026	3		504OS	3	22807	3163.59	316.097	2		502OS	3	4259	590.771	1692.7	2
	501OD	4	7016	973.198	1027.54	1		504OD	4	6632	919.932	1087.04	1		502OD	4	12311	1707.67	585.592	3		509OD1	4	11552	1602.39	624.067	3		501OS	4	33541	4652.51	214.938	3		504OS	4	53644	7441.02	134.39	3		502OS	4	5048	700.214	1428.13	2
	501OD	5	4900	679.685	1471.27	1		504OD	5	8526	1182.65	845.558	1		502OD	5	4057	562.751	1776.98	2		509OD1	5	11783	1634.43	611.833	1		501OS	5	21753	3017.38	331.413	4		504OS	5	6716	931.584	1073.44	2		502OS	5	21970	3047.48	328.14	3
	501OD	6	5302	735.447	1359.72	2		504OD	6	6919	959.743	1041.95	1		502OD	6	8962	1243.13	804.421	3		509OD1	6	12133	1682.98	594.183	1		501OS	6	24739	3431.58	291.411	3		504OS	6	21510	2983.68	335.157	2		502OS	6	17612	2442.98	409.336	3
	501OD	7	6546	908.003	1101.32	2		504OD	7	5437	754.173	1325.96	2		502OD	7	5652	783.996	1275.52	3		509OD1	7	4176	579.258	1726.35	2		501OS	7	15365	2131.3	469.198	4		504OS	7	33340	4624.63	216.234	3		502OS	7	15790	2190.25	456.569	3
	501OD	8	3152	437.218	2287.19	1		504OD	8	6319	876.516	1140.88	2		502OD	8	4355	604.087	1655.39	2		509OD1	8	7345	1018.83	981.515	3		501OS	8	52834	7328.67	136.45	3		504OS	8	18043	2502.77	399.558	2		502OS	8	8900	1234.53	810.025	3
	501OD	9	13724	1903.67	525.301	3		504OD	9	7339	1018	982.317	3		502OD	9	4068	564.277	1772.18	2		509OD1	9	5030	697.717	1433.25	2		501OS	9	36800	5104.57	195.903	2		504OS	9	14349	1990.37	502.42	2		502OS	9	7220	1001.49	998.508	2
	501OD	10	11966	1659.82	602.476	1		504OD	10	4646	644.452	1551.71	3		502OD	10	5266	730.453	1369.01	3		509OD1	10	6237	865.142	1155.88	1		501OS	10	12419	1722.65	580.5	4		504OS	10	23386	3243.9	308.271	1		502OS	10	5747	797.173	1254.43	2
	501OD	11	4788	664.149	1505.69	2		504OD	11	17472	2423.56	412.616	3		502OD	11	3643	505.325	1978.93	2		509OD1	11	7501	1040.47	961.102	1		501OS	11	42451	5888.43	169.825	3		504OS	11	17728	2459.07	406.658	3		502OS	11	40687	5643.74	177.187	3
	501OD	12	4994	692.724	1443.58	1		504OD	12	5982	829.77	1205.15	2		502OD	12	6532	906.061	1103.68	1		509OD1	12	4265	591.603	1690.32	1		501OS	12	14949	2073.59	482.255	2		504OS	12	38054	5278.51	189.447	1		502OS	12	19844	2752.58	363.295	3
	501OD	13	3950	547.909	1825.12	2		504OD	13	5888	816.731	1224.39	2		502OD	13	5785	802.444	1246.19	1		509OD1	13	3868	536.535	1863.81	1		501OS	13	8877	1231.34	812.124	1		504OS	13	8067	1118.98	893.669	2		502OS	13	60094	8335.71	119.966	3
	501OD	14	5323	738.36	1354.35	2		504OD	14	5117	709.785	1408.88	2		502OD	14	6374	884.145	1131.04	1		509OD1	14	4224	585.916	1706.73	1		501OS	14	16012	2221.04	450.239	2		504OS	14	12464	1728.9	578.404	2		502OS	14	6073	842.393	1187.09	2
	501OD	15	12662	1756.36	569.359	3		504OD	15	6788	941.571	1062.05	1		502OD	15	4628	641.955	1557.74	1		509OD1	15	5399	748.902	1335.29	3		501OS	15	27792	3855.06	259.399	2		504OS	15	8634	1197.63	834.981	2		502OS	15	5130	711.588	1405.31	2
	501OD	16	6313	875.684	1141.96	1		504OD	16	7566	1049.49	952.845	2		502OD	16	5417	751.398	1330.85	3		509OD1	16	4710	653.33	1530.62	2		501OS	16	38516	5342.6	187.175	3		504OS	16	25372	3519.38	284.141	4		502OS	16	21919	3040.41	328.903	3
	501OD	17	12956	1797.14	556.439	3		504OD	17	5990	830.88	1203.54	2		502OD	17	4822	668.865	1495.07	2		509OD1	17	4142	574.542	1740.52	1		501OS	17	5098	707.15	1414.13	2		504OS	17	21290	2953.16	338.62	3		502OS	17	61285	8500.91	117.634	3
	501OD	18	3413	473.421	2112.28	2		504OD	18	4353	603.81	1656.15	3		502OD	18	13474	1868.99	535.047	3		509OD1	18	4967	688.978	1451.42	1		501OS	18	12306	1706.98	585.83	3		504OS	18	5382	746.543	1339.51	2		502OS	18	6324	877.209	1139.98	2
	501OD	19	4076	565.387	1768.7	2		504OD	19	5840	810.073	1234.46	1		502OD	19	4719	654.578	1527.7	2		509OD1	19	15298	2122	471.253	3		501OS	19	9042	1254.23	797.304	2		504OS	19	21468	2977.85	335.813	3		502OS	19	6229	864.032	1157.36	1
	501OD	20	5735	795.509	1257.06	1		504OD	20	7233	1003.3	996.713	4		502OD	20	13145	1823.36	548.439	3		509OD1	20	5348	741.827	1348.02	3		501OS	20	12899	1789.24	558.898	2		504OS	20	13212	1832.65	545.657	2		502OS	20	7644	1060.31	943.122	2
	501OD	21	5041	699.243	1430.12	2		504OD	1	7007	971.949	1028.86	1		502OD	21	5098	707.15	1414.13	2		509OD1	21	14922	2069.85	483.127	3		501OS	21	22799	3162.48	316.208	3		504OS	21	25159	3489.83	286.547	1		502OS	21	6250	866.945	1153.48	2
	501OD	22	3412	473.282	2112.9	2		504OD	2	6550	908.558	1100.65	1		502OD	22	4376	607	1647.45	2		509OD1	22	4218	585.084	1709.16	2		501OS	22	18160	2518.99	396.984	2		504OS	22	15359	2130.46	469.381	3		502OS	22	37849	5250.08	190.473	3
	501OD	23	5596	776.228	1288.28	2		504OD	3	4954	687.175	1455.23	1		502OD	23	10320	1431.5	698.568	1		509OD1	23	3001	416.272	2402.27	1		501OS	23	22774	3159.01	316.555	3		504OS	23	19383	2688.64	371.935	2		502OS	23	7988	1108.02	902.507	2
	501OD	24	5776	801.196	1248.13	3		504OD	4	7007	971.949	1028.86	1		502OD	24	6273	870.135	1149.25	2		509OD1	24	6043	838.232	1192.99	2		501OS	24	3625	502.828	1988.75	2		504OS	24	9017	1250.76	799.515	3		502OS	24	8052	1116.9	895.333	1
	501OD	25	6759	937.549	1066.61	3		504OD	5	5721	793.567	1260.13	1		502OD	25	2510	348.165	2872.2	2		509OD1	25	5234	726.014	1377.38	1		501OS	25	22481	3118.37	320.681	2		504OS	25	9866	1368.52	730.714	1		502OS	25	12024	1667.86	599.57	2
	501OD	26	22074	3061.91	326.594	3		504OD	6	7156	992.617	1007.44	1		502OD	26	3630	503.522	1986.01	2		509OD1	26	5108	708.537	1411.36	1		501OS	26	3682	510.735	1957.96	2		504OS	26	6311	875.406	1142.33	2		502OS	26	18488	2564.49	389.941	3
	501OD	27	5796	803.97	1243.83	2		504OD	7	4726	655.549	1525.44	2		502OD	27	7325	1016.06	984.195	1		509OD1	27	3243	449.84	2223.01	4		501OS	27	22468	3116.56	320.866	3		504OS	27	9492	1316.65	759.505	1		502OS	27	15989	2217.85	450.887	3
	501OD	28	12161	1686.87	592.815	1		504OD	8	13146	1823.5	548.397	3		502OD	28	3885	538.893	1855.66	1		509OD1	28	4775	662.346	1509.79	2		501OS	28	6263	868.748	1151.08	2		504OS	28	4422	613.381	1630.31	1		502OS	28	18869	2617.34	382.067	3
	501OD	29	5061	702.017	1424.47	1		504OD	9	5769	800.225	1249.65	2		502OD	29	4831	670.114	1492.28	1		509OD1	29	4645	644.313	1552.04	2		501OS	29	10233	1419.43	704.507	1		504OS	29	8279	1148.39	870.785	1		502OS	29	9955	1380.87	724.181	1
	501OD	30	5390	747.653	1337.52	2		504OD	10	4603	638.487	1566.2	2		502OD	30	5034	698.272	1432.11	2		509OD1	30	12580	1744.99	573.07	3		501OS	30	9671	1341.48	745.448	1		504OS	30	5868	813.957	1228.57	2		502OS	30	8020	1112.46	898.906	2
	501OD	31	5032	697.995	1432.68	2		504OD	11	10010	1388.5	720.202	4		502OD	31	5466	758.195	1318.92	1		509OD1	31	3047	422.653	2366.01	2		501OS	31	21454	2975.91	336.032	2		504OS	31	9105	1262.97	791.787	1		502OS	31	13563	1881.34	531.536	1
	501OD	32	5695	789.96	1265.89	1		504OD	12	30207	4190.05	238.661	3		502OD	32	3485	483.408	2068.64	2		509OD1	32	6228	863.893	1157.55	2		501OS	32	19209	2664.5	375.305	1		504OS	32	23001	3190.5	313.431	2		502OS	32	12963	1798.11	556.139	1
	501OD	33	8845	1226.9	815.062	1		504OD	13	4276	593.129	1685.97	4		502OD	33	4520	626.974	1594.96	3		509OD1	33	5291	733.921	1362.54	1		501OS	33	26266	3643.39	274.47	3		504OS	33	14994	2079.84	480.807	2		502OS	33	38194	5297.93	188.753	3
	501OD	34	5316	737.389	1356.14	2		504OD	14	7983	1107.33	903.072	2		502OD	34	5532	767.35	1303.19	1		509OD1	34	4014	556.787	1796.02	1		501OS	34	11556	1602.95	623.851	2		504OS	34	33223	4608.4	216.995	4		502OS	34	4134	573.432	1743.89	2
	501OD	35	5593	775.812	1288.97	1		504OD	15	8026	1113.3	898.234	1		502OD	35	3799	526.964	1897.66	2		509OD1	35	10851	1505.15	664.383	2		501OS	35	8624	1196.25	835.949	2		504OS	35	10452	1449.81	689.746	2		502OS	35	28236	3916.65	255.32	2
	501OD	36	6820	946.01	1057.07	2		504OD	16	9212	1277.81	782.591	3		502OD	36	12326	1709.75	584.88	3		509OD1	36	15493	2149.05	465.321	3		501OS	36	15255	2116.04	472.581	3		504OS	36	18277	2535.22	394.442	3		502OS	36	7877	1092.63	915.225	2
	501OD	37	5268	730.73	1368.49	2		504OD	17	5294	734.337	1361.77	2		502OD	37	4394	609.497	1640.7	2		509OD1	37	4480	621.426	1609.2	2		501OS	37	6869	952.807	1049.53	3		504OS	37	16671	2312.45	432.441	2		502OS	37	6638	920.765	1086.05	2
	501OD	38	13915	1930.17	518.09	1		504OD	18	7698	1067.8	936.506	1		502OD	38	4571	634.049	1577.17	1		509OD1	38	5684	788.434	1268.34	2		501OS	38	18506	2566.99	389.561	3		504OS	38	7144	990.953	1009.13	2		502OS	38	19122	2652.43	377.012	1
	501OD	39	6648	922.152	1084.42	1		504OD	19	6180	857.235	1166.54	3		502OD	39	11362	1576.04	634.503	3		509OD1	39	17801	2469.2	404.99	3		501OS	39	19681	2729.97	366.304	1		504OS	39	8313	1153.11	867.223	1		502OS	39	7211	1000.25	999.754	1
	501OD	40	15027	2084.41	479.751	2		504OD	20	5911	819.922	1219.63	2		502OD	40	3730	517.393	1932.77	2		509OD1	40	5716	792.873	1261.24	1		501OS	40	6542	907.448	1101.99	2		504OS	40	7883	1093.46	914.528	3		502OS	40	10165	1410	709.22	3
	501OD	41	6204	860.564	1162.03	2		504OD	21	5091	706.179	1416.07	1		502OD	41	4782	663.317	1507.58	2		509OD1	41	6318	876.377	1141.06	3		501OS	41	8602	1193.19	838.087	1		504OS	41	18054	2504.29	399.315	3		502OS	41	6300	873.88	1144.32	1
	501OD	42	5224	724.627	1380.02	1		504OD	22	6643	921.458	1085.24	1		502OD	42	4338	601.729	1661.88	2		509OD1	42	4581	635.436	1573.72	2		501OS	42	7918	1098.32	910.486	2		504OS	42	22743	3154.71	316.987	2		502OS	42	16265	2256.14	443.235	1
	501OD	43	6877	953.917	1048.31	2		504OD	23	7712	1069.74	934.806	1		502OD	43	4726	655.549	1525.44	1		509OD1	43	6667	924.787	1081.33	3		501OS	43	8024	1113.02	898.458	2		504OS	43	16350	2267.93	440.931	3		502OS	43	11288	1565.77	638.663	2
	501OD	44	13053	1810.6	552.304	1		504OD	24	9742	1351.32	740.015	1		502OD	44	5584	774.563	1291.05	3		509OD1	44	3385	469.537	2129.76	2		501OS	44	20870	2894.9	345.435	3		504OS	44	15429	2140.17	467.252	3		502OS	44	6336	878.874	1137.82	2
	501OD	45	6551	908.697	1100.48	1		504OD	25	4879	676.772	1477.6	1		502OD	45	4330	600.619	1664.95	1		509OD1	45	4217	584.945	1709.56	1		501OS	45	21615	2998.24	333.529	3		504OS	45	5093	706.456	1415.52	2		502OS	45	25898	3592.34	278.37	3
	501OD	46	15026	2084.27	479.783	1		504OD	26	5095	706.733	1414.96	2		502OD	46	5441	754.727	1324.98	3		509OD1	46	3988	553.18	1807.73	2		501OS	46	5570	772.621	1294.3	1		504OS	46	39601	5493.1	182.047	1		502OS	46	4332	600.897	1664.18	2
	501OD	47	19266	2672.41	374.194	3		504OD	27	7507	1041.3	960.334	3		502OD	47	4062	563.445	1774.8	2		509OD1	47	5344	741.272	1349.03	2		501OS	47	9955	1380.87	724.181	2		504OS	47	7530	1044.5	957.4	3		502OS	47	7567	1049.63	952.719	2
	501OD	48	8892	1233.42	810.754	1		504OD	28	5212	722.963	1383.2	2		502OD	48	6814	945.178	1058	3		509OD1	48	3917	543.332	1840.5	2		501OS	48	6545	907.865	1101.49	2		504OS	48	7105	985.543	1014.67	1		502OS	48	11763	1631.66	612.873	4
	501OD	49	4726	655.549	1525.44	1		504OD	29	4221	585.5	1707.94	2		502OD	49	8123	1126.75	887.508	3		509OD1	49	3694	512.399	1951.6	2		501OS	49	58842	8162.04	122.518	3		504OS	49	5463	757.779	1319.65	2		502OS	49	20325	2819.3	354.697	3
	501OD	50	2750	381.456	2621.54	2		504OD	30	5027	697.301	1434.1	1		502OD	50	4246	588.968	1697.89	2		509OD1	50	5424	752.369	1329.13	1		501OS	50	6469	897.323	1114.43	2		504OS	50	4448	616.987	1620.78	3		502OS	50	4748	658.601	1518.37	2
[truncated: 6 more columns]

## Sheet: Histogram
Figure6b
		Area (um2)							Ad-Cas9 injection			No injection
		Ad-Cas9	No injection			Bin range		Bin	Frequency		Bin	Frequency
	1	5929.76	2418.01			0		0	0		0	0
	2	1439.27	919.794			500		500	9		500	2
	3	1562.17	4565.68			1000		1000	106		1000	45
	4	973.198	4652.51			1500		1500	36		1500	42
	5	679.685	3017.38			2000		2000	35		2000	17
	6	735.447	3431.58			2500		2500	8		2500	23
	7	908.003	2131.3			3000		3000	2		3000	27
	8	437.218	7328.67			3500		3500	1		3500	18
	9	1903.67	5104.57			4000		4000	1		4000	6
	10	1659.82	1722.65			4500		4500	1		4500	1
	11	664.149	5888.43			5000		5000	0		5000	6
	12	692.724	2073.59					More	1		More	13
	13	547.909	1231.34
	14	738.36	2221.04
	15	1756.36	3855.06
	16	875.684	5342.6
	17	1797.14	707.15
	18	473.421	1706.98
	19	565.387	1254.23
	20	795.509	1789.24
	21	699.243	3162.48
	22	473.282	2518.99
	23	776.228	3159.01
	24	801.196	502.828
	25	937.549	3118.37
	26	3061.91	510.735
	27	803.97	3116.56
	28	1686.87	868.748
	29	702.017	1419.43
	30	747.653	1341.48
	31	697.995	2975.91
	32	789.96	2664.5
	33	1226.9	3643.39
	34	737.389	1602.95
	35	775.812	1196.25
	36	946.01	2116.04
	37	730.73	952.807
	38	1930.17	2566.99
	39	922.152	2729.97
	40	2084.41	907.448
	41	860.564	1193.19
	42	724.627	1098.32
	43	953.917	1113.02
	44	1810.6	2894.9
	45	908.697	2998.24
	46	2084.27	772.621
	47	2672.41	1380.87
	48	1233.42	907.865
	49	655.549	8162.04
	50	381.456	897.323
	51	874.019	3354.31
	52	1091.1	3376.92
	53	806.189	3163.59
	54	919.932	7441.02
	55	1182.65	931.584
	56	959.743	2983.68
	57	754.173	4624.63
	58	876.516	2502.77
	59	1018	1990.37
	60	644.452	3243.9
	61	2423.56	2459.07
	62	829.77	5278.51
	63	816.731	1118.98
	64	709.785	1728.9
	65	941.571	1197.63
	66	1049.49	3519.38
	67	830.88	2953.16
	68	603.81	746.543
	69	810.073	2977.85
	70	1003.3	1832.65
	71	971.949	3489.83
	72	908.558	2130.46
	73	687.175	2688.64
	74	971.949	1250.76
	75	793.567	1368.52
	76	992.617	875.406
	77	655.549	1316.65
	78	1823.5	613.381
	79	800.225	1148.39
	80	638.487	813.957
	81	1388.5	1262.97
	82	4190.05	3190.5
	83	593.129	2079.84
	84	1107.33	4608.4
	85	1113.3	1449.81
	86	1277.81	2535.22
	87	734.337	2312.45
	88	1067.8	990.953
	89	857.235	1153.11
	90	819.922	1093.46
	91	706.179	2504.29
	92	921.458	3154.71
	93	1069.74	2267.93
	94	1351.32	2140.17
	95	676.772	706.456
	96	706.733	5493.1
	97	1041.3	1044.5
	98	722.963	985.543
	99	585.5	757.779
	100	697.301	616.987
	101	984.732	4144
	102	1405.03	2566.71
	103	1270.57	590.771
	104	585.592	700.214
	105	1776.98	3047.48
	106	804.421	2442.98
	107	1275.52	2190.25
	108	1655.39	1234.53
	109	1772.18	1001.49
	110	1369.01	797.173
	111	1978.93	5643.74
	112	1103.68	2752.58
	113	1246.19	8335.71
	114	1131.04	842.393
	115	1557.74	711.588
	116	1330.85	3040.41
	117	1495.07	8500.91
	118	535.047	877.209
	119	1527.7	864.032
	120	548.439	1060.31
	121	1414.13	866.945
	122	1647.45	5250.08
	123	698.568	1108.02
	124	1149.25	1116.9
	125	2872.2	1667.86
	126	1986.01	2564.49
	127	984.195	2217.85
	128	1855.66	2617.34
	129	1492.28	1380.87
	130	1432.11	1112.46
	131	1318.92	1881.34
	132	2068.64	1798.11
	133	1594.96	5297.93
	134	1303.19	573.432
	135	1897.66	3916.65
	136	584.88	1092.63
	137	1640.7	920.765
	138	1577.17	2652.43
	139	634.503	1000.25
	140	1932.77	1410
	141	1507.58	873.88
	142	1661.88	2256.14
	143	1525.44	1565.77
	144	1291.05	878.874
	145	1664.95	3592.34
	146	1324.98	600.897
	147	1774.8	1049.63
	148	1058	1631.66
	149	887.508	2819.3
	150	1697.89	658.601
	151	3788.48	3616.48
	152	386.727	1444.82
	153	1665.92	4855.17
	154	1602.39	2358.37
	155	1634.43	1078.34
	156	1682.98	4790.67
	157	579.258	1032.84
	158	1018.83	2296.09
	159	697.717	1657.88
	160	865.142	1209.56
	161	1040.47	1179.18
	162	591.603	922.984
	163	536.535	1063.22
	164	585.916	786.908
	165	748.902	861.812
	166	653.33	824.499
	167	574.542	1469.92
	168	688.978	2415.65
	169	2122	3143.2
	170	741.827	2785.88
	171	2069.85	1888.83
	172	585.084	2990.34
	173	416.272	2782.96
	174	838.232	940.739
	175	726.014	2879.51
	176	708.537	1431.36
	177	449.84	2067.21
	178	662.346	1166.98
	179	644.313	429.727
	180	1744.99	821.309
	181	422.653	2150.72
	182	863.893	1790.21
	183	733.921	769.986
	184	556.787	2126.58
	185	1505.15	426.121
	186	2149.05	1949.03
	187	621.426	1119.26
	188	788.434	2833.73
	189	2469.2	884.284
	190	792.873	2533.84
	191	876.377	2041.55
	192	635.436	3242.65
	193	924.787	646.117
	194	469.537	3118.92
	195	584.945	2313.98
	196	553.18	2525.51
	197	741.272	756.531
	198	543.332	1934.33
	199	512.399	821.309
	200	752.369	1007.32

## Sheet: Hexagonality&COV
Figure 6c and 6d
		Hex					COV
			No injection	Ad-Cas9 injection				No injection	Ad-Cas9 injection
		C57_12M	Col8a2_12M	Col8a2_12M			C57_12M	Col8a2_12M	Col8a2_12M
		0.5	0.14	0.4			0.225016	0.693479	0.459074
		0.54	0.22	0.4			0.159209	0.617551	0.274865
		0.64	0.2	0.3			0.162674	0.601167	0.328236
		0.52	0.1	0.36			0.204548	0.632204	0.417635
	average	0.55	0.165	0.365		average	0.187862	0.636101	0.369953
	stdev	0.0621825	0.0550757	0.0472582		stdev	0.0322196	0.0402984	0.0836621
