# Supplementary material for: Start codon disruption with CRISPR/Cas9 prevents murine Fuchs’ endothelial corneal dystrophy
Source: eLife. 2021 Jun 8;10:e55637. doi: 10.7554/eLife.55637 (PMC8216720; doi:10.7554/eLife.55637)
Supplement: Figure 9—source data 1. [file elife-55637-fig9-data1.xlsx]

## Sheet: Sheet1
		Bump numbers per image
		no injection				ad-cas9 injected
		378OS	380OS	381OS	386OS	378OD	380OD	381OD	386OD
		5	4	4	14	0	0	0	0
		4	1	0	8	0	0	1	0
		6	1	7	7	0	0	1	0
		4	4	5	9	2	1	1	2
	sum	19	10	16	38	2	1	3	2
		Histgram
			no injection	Ad-cas9
			OS	OD
		0	1	10
		1-3	2	6
		4-6	8	0
		7-9	4	0
		>10	1	0
