# Supplementary material for: Start codon disruption with CRISPR/Cas9 prevents murine Fuchs’ endothelial corneal dystrophy
Source: eLife. 2021 Jun 8;10:e55637. doi: 10.7554/eLife.55637 (PMC8216720; doi:10.7554/eLife.55637)
Supplement: Figure 10—figure supplement 1—source data 1. [file elife-55637-fig10-figsupp1-data1.xlsx]

## Sheet: Sheet1
	Central corneal thickness by corneal OCT
		C57	No Injection	Ad-Cas9-col8a2gRNA
		91.7647	94.1176	94.1176
		94.1176	105.882	96.4706
		94.1176	98.8235	96.4706
		103.529	98.8235	94.1176
	average	95.8824	99.4118	95.2941
	stdev	5.21731	4.85071	1.35847

## Sheet: Sheet2
Anova: Single Factor
SUMMARY
Groups	Count	Sum	Average	Variance
C57	4	383.529	95.8824	27.2203
No Injection	4	397.647	99.4118	23.5294
Ad-Cas9-col8a2gRNA	4	381.176	95.2941	1.84544
ANOVA
Source of Variation	SS	df	MS	F	P-value	F crit
Between Groups	39.677	2	19.8385	1.13158	0.364435	4.25649
Within Groups	157.785	9	17.5317
Total	197.463	11
