# Supplementary material for: Start codon disruption with CRISPR/Cas9 prevents murine Fuchs’ endothelial corneal dystrophy
Source: eLife. 2021 Jun 8;10:e55637. doi: 10.7554/eLife.55637 (PMC8216720; doi:10.7554/eLife.55637)
Supplement: Figure 10—figure supplement 2—source data 1. [file elife-55637-fig10-figsupp2-data1.xlsx]

## Sheet: Sheet1
			total cornea thickness (um)	stroma thickness	epithelium thickness
	Cornea1	Before	108.235	82.3529	25.8824
		After	141.176	89.4118	51.7647
	Cornea2	Before	101.176	70.5882	30.5882
		After	122.353	80	42.3529
	Cornea3	Before	103.529	77.6471	25.8824
		After	136.471	87.0588	49.4118
	Cornea4	Before	100	70.5882	29.4118
		After	129.412	84.7059	44.7059
	Cornea5	Before	103.529	75.2941	28.2353
		After	137.647	89.4118	48.2353
		Before average	103.294	75.2941	28
		Before stdev	3.1568	4.99134	2.10453
		After average	133.412	86.1176	47.2941
		After stdev	7.51469	3.93722	3.75735
