# Supplementary material for: Start codon disruption with CRISPR/Cas9 prevents murine Fuchs’ endothelial corneal dystrophy
Source: eLife. 2021 Jun 8;10:e55637. doi: 10.7554/eLife.55637 (PMC8216720; doi:10.7554/eLife.55637)
Supplement: Figure 10—source data 1. [file elife-55637-fig10-data1.xlsx]

## Sheet: Sheet1
In vivo corneal OCT thickness measurement
Top: Summary
Bottom: Source data		Figure 8D									Figure8E
			C57		Col8a2 No treatment		Col8a2 AdCas9 injected				C57		Col8a2 No treatment		Col8a2 AdCas9 injected
			Average (um)	SD (um)	Average (um)	SD (um)	Average (um)	SD (um)			Average (um)	SD (um)	Average (um)	SD (um)	Average (um)	SD (um)
		Pre Scrape	100.208	5.5978	93.9792	6.69347	91	8.47496		0 to 5 min	-15.4375	7.10183	-3.79167	5.5978	-11.9167	4.44035
		After Scrape	60.125	7.62193	56.3333	4.89302	62.2917	10.7627		0 to 10 min	-33.3125	10.3669	-16.7917	11.8821	-29.25	8.95963
		10min 650mOsm PBS	189.042	11.8821	179.562	9.73645	185.25	10.4809		0 to 20 min	-58.2292	12.3507	-33.5833	19.8933	-58.5	13.7886
		Oil_0min	182.271	13.2581	171.708	9.28765	175.5	12.8365		0 to 30 min	-75.0208	9.55393	-46.5833	22.2967	-72.0417	16.8771
		5min	166.833	15.0579	167.917	6.05117	163.583	11.9265		0 to 40 min	-85.8542	12.5206	-56.3333	23.853	-85.0417	21.5989
		10min	148.958	16.3687	154.917	8.88069	146.25	9.41939		0 to 50 min	-92.8958	13.7278	-62.8333	19.4639	-88.8333	18.3464
		20min	124.042	16.4973	138.125	13.903	117	16.0538
		30min	107.25	13.1615	125.125	17.411	103.458	11.1483
		40min	96.4167	7.59879	115.375	17.652	90.4583	11.8821
		50min	89.375	6.73934	108.875	13.2813	86.6667	11.5668
	Source data
	Corneal Thickbess from corneal OCT
	Urbitary unit, 1 = 3.25um
			C57bl6j								Col8A2 NoInjection								Col8A2 AdCas9treated
			Corneal Thickness (urbitary unit)						average	stdev	Corneal Thickness (urbitary unit)						average	stdev	Corneal Thickness (urbitary unit)						average	stdev
	Pre Scrape	-30	30	31	30	31	29	34	30.8333	1.7224	31	29.5	25	29	29	30	28.9167	2.05953	31	30	30	25	26	26	28	2.60768
	After Scrape	-20	18	20	16	16	19	22	18.5	2.34521	20	16	17	16	18	17	17.3333	1.50555	25	21	17	18	16	18	19.1667	3.3116
	10min 650mOsm PBS	-10	54	55	61	56	60	63	58.1667	3.65605	55	59.5	51	57	53	56	55.25	2.99583	59	55	58	62	54	54	57	3.2249
	Oil_0min	0	51.5	53	58	53	60	61	56.0833	4.07942	53	57	49	55	51	52	52.8333	2.85774	58	52	55	59	50	50	54	3.94968
	5min	5	48	50	54	45	53	58	51.3333	4.63321	50	54	49	53	52	52	51.6667	1.8619	55	48	49	55	48	47	50.3333	3.6697
	10min	10	45	43	50	38	47	52	45.8333	5.03653	43	49	46	48	50	50	47.6667	2.73252	48	43	42	49	45	43	45	2.89828
	20min	20	38	36	43	30	38	44	38.1667	5.07609	36	40	43	42	48	46	42.5	4.27785	39	34	34	41	40	28	36	4.93964
	30min	30	33	31	36	26	35	37	33	4.04969	31	35	37	39	45	44	38.5	5.35724	34	32	30	31	37	27	31.8333	3.43026
	40min	40	30	31	31	25	31	30	29.6667	2.33809	31	30	34	34	44	40	35.5	5.43139	28	32	27	23	32	25	27.8333	3.65605
	50min	50	27	30	29	24	28	27	27.5	2.07364	30	30	32	32	40	37	33.5	4.08656	24	31	25	28	30	22	26.6667	3.55903
			25
			C57bl6j								Col8A2 NoInjection								Col8A2 AdCas9treated
			Difference of Corneal Thickness (urbitary unit)						average	stdev	Difference of Corneal Thickness (urbitary unit)						average	stdev	Difference of Corneal Thickness (urbitary unit)						average	stdev
		0 to 5 min	-3.5	-3	-4	-8	-7	-3	-4.75	2.18518	-3	-3	0	-2	1	0	-1.16667	1.7224	-3	-4	-6	-4	-2	-3	-3.66667	1.36626
		0 to 10 min	-6.5	-10	-8	-15	-13	-9	-10.25	3.18983	-10	-8	-3	-7	-1	-2	-5.16667	3.65605	-10	-9	-13	-10	-5	-7	-9	2.75681
		0 to 20 min	-13.5	-17	-15	-23	-22	-17	-17.9167	3.80022	-17	-17	-6	-13	-3	-6	-10.3333	6.121	-19	-18	-21	-18	-10	-22	-18	4.24264
		0 to 30 min	-18.5	-22	-22	-27	-25	-24	-23.0833	2.93967	-22	-22	-12	-16	-6	-8	-14.3333	6.86052	-24	-20	-25	-28	-13	-23	-22.1667	5.19294
		0 to 40 min	-21.5	-22	-27	-28	-29	-31	-26.4167	3.85249	-22	-27	-15	-21	-7	-12	-17.3333	7.33939	-30	-20	-28	-36	-18	-25	-26.1667	6.6458
		0 to 50 min	-24.5	-23	-29	-29	-32	-34	-28.5833	4.22394	-23	-27	-17	-23	-11	-15	-19.3333	5.98888	-34	-21	-30	-31	-20	-28	-27.3333	5.64506
