# Supplementary material for: Start codon disruption with CRISPR/Cas9 prevents murine Fuchs’ endothelial corneal dystrophy
Source: eLife. 2021 Jun 8;10:e55637. doi: 10.7554/eLife.55637 (PMC8216720; doi:10.7554/eLife.55637)
Supplement: Table 1—source data 1. [file elife-55637-table1-data1.xlsx]

## Sheet: Sheet1
Further details of data are available in Figure5-source data file.
		Cornea1					Cornea2					Cornea3					Cornea4
		Forward	Reverse	Total			Forward	Reverse	Total			Forward	Reverse	Total			Forward	Reverse	Total
	No change	34614	33614	68228		No change	34746	34709	69455		No change	33514	38150	71664		No change	35154	34593	69747
	Insertion	8225	8153	16378		Insertion	12186	12016	24202		Insertion	6504	7004	13508		Insertion	10211	9620	19831
	Deletion	1488	1460	2948		Deletion	2119	1973	4092		Deletion	1303	1433	2736		Deletion	1882	1774	3656
	InDel	9713	9613	19326		InDel	14305	13989	28294		InDel	7807	8437	16244		InDel	12093	11394	23487
	Total Read	44327	43227	87554		Total Read	49051	48698	97749		Total Read	41321	46587	87908		Total Read	47247	45987	93234
	Indel(%)	0.219122	0.222384	0.220732		Indel(%)	0.291635	0.28726	0.289456		Indel(%)	0.188935	0.181102	0.184784		Indel(%)	0.255953	0.247766	0.251915
	Insertion(%)	0.185553	0.188609	0.187062		Insertion(%)	0.248435	0.246745	0.247593		Insertion(%)	0.157402	0.150342	0.153661		Insertion(%)	0.21612	0.20919	0.212701
	Deletion (%)	0.0335687	0.0337752	0.0336706		Deletion (%)	0.0431999	0.040515	0.0418623		Deletion (%)	0.0315336	0.0307597	0.0311234		Deletion (%)	0.0398332	0.0385761	0.0392132
	Table. Indel Rate
		Total read	No change	Insertion	Deletion	Indel
	Cornea1	87554	68228	16378	2948	19326
	Cornea2	97749	69455	24202	4092	28294
	Cornea3	87908	71664	13508	2736	16244
	Cornea4	93234	69747	19831	3656	23487
	Average of ratio		76.3 ± 4.5 %	20.0 ± 4.0 %	3.6 ± 0.5 %	23.7 ± 4.5 %
