# Supplementary material for: Start codon disruption with CRISPR/Cas9 prevents murine Fuchs’ endothelial corneal dystrophy
Source: eLife. 2021 Jun 8;10:e55637. doi: 10.7554/eLife.55637 (PMC8216720; doi:10.7554/eLife.55637)
Supplement: Table 2—source data 1. [file elife-55637-table2-data1.xlsx]

## Sheet: SingleInsertion
			Cornea1			Cornea2			Cornea3			Cornea1
			Forward	Reverse		Forward	Reverse		Forward	Reverse		Forward	Reverse
		A insertion	3923	4002		5437	5440		2878	3157		5012	4694
		T insertion	3436	3267		5545	5345		2918	3095		4187	3901
		G insertion	120	110		147	147		160	160		188	168
		C insertion	388	409		636	618		329	386		335	344
		Each number is reading number
		Single Inseration number at the target site was counted
			Total read number of single insertion	A	T	G	C
		Cornea1	15655	7925	6703	230	797
				-0.506	-0.428	-0.015	-0.051
		Cornea2	23315	10877	10890	294	1254
				-0.467	-0.467	-0.013	-0.054
		Cornea3	13083	6035	6013	320	715
				-0.461	-0.46	-0.024	-0.055
		Cornea4	18829	9706	8088	356	679
				-0.515	-0.43	-0.019	-0.036
		Average of ratio		48.7 ± 2.7 %	44.6 ± 2.0 %	1.8 ± 0.5 %	4.9 ± 0.9 %
